# Supplementary material
Source: Elsevier journal article supplement (https://www.sciencedirect.com/science/article/pii/S0213911118302255)
Supplement: mmc1 [file S0213911118302255:mmc1.docx]

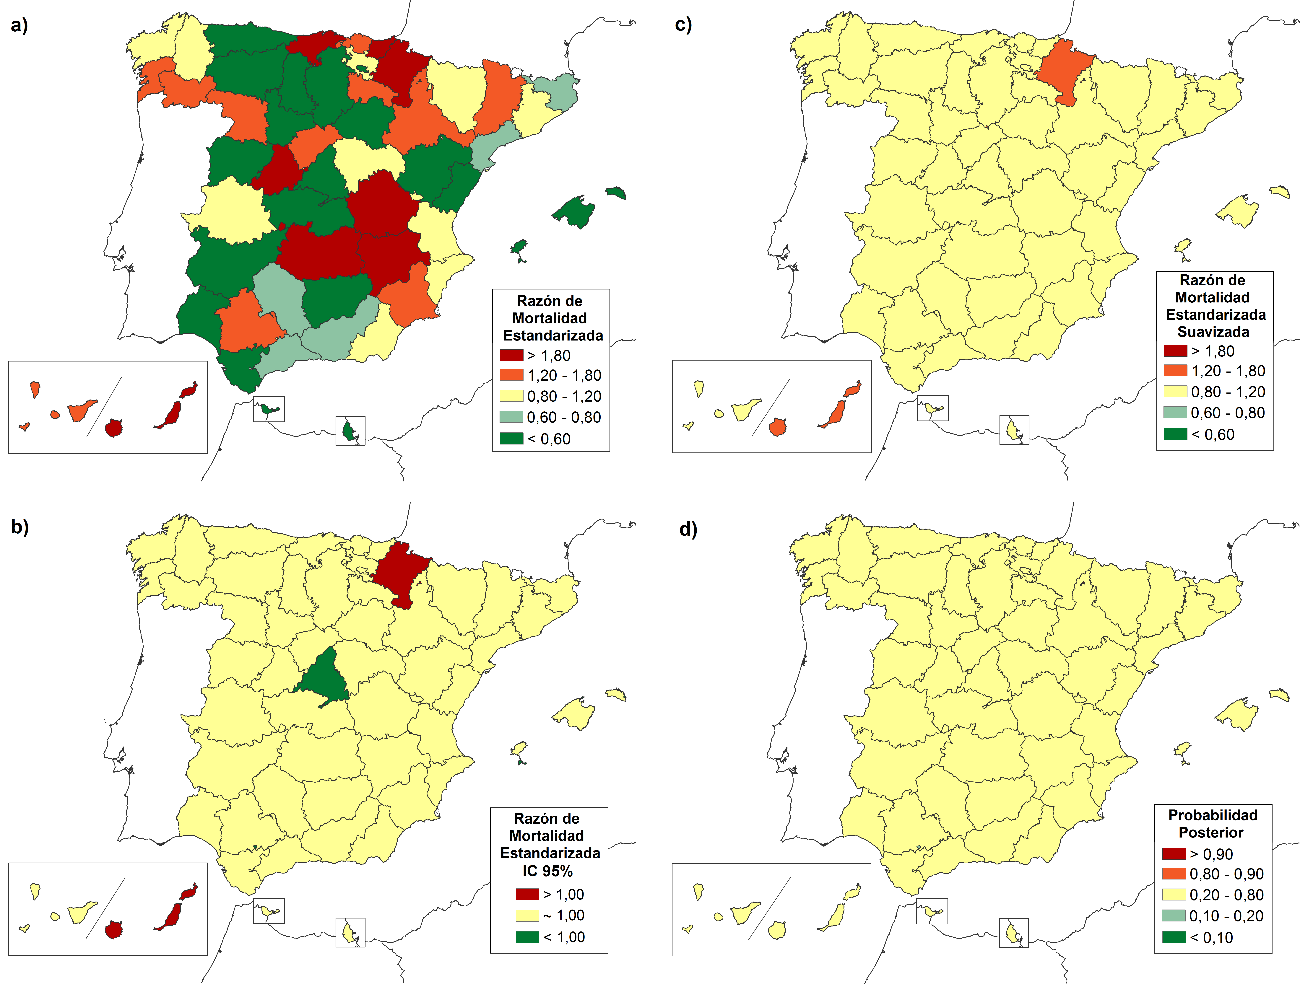


**Figura I.** Variabilidad provincial de la mortalidad atribuida a la telangiectasia hemorrágica hereditaria en España para varones (1981-2016). **a)** Razón de mortalidad estandarizada (RME). **b)** Intervalo de confianza del 95% de la RME, valores significativamente por encima o por debajo de lo esperado para el total nacional. **c)** RME suavizadas. **d)** Probabilidad *a posteriori* de las RME suavizadas.


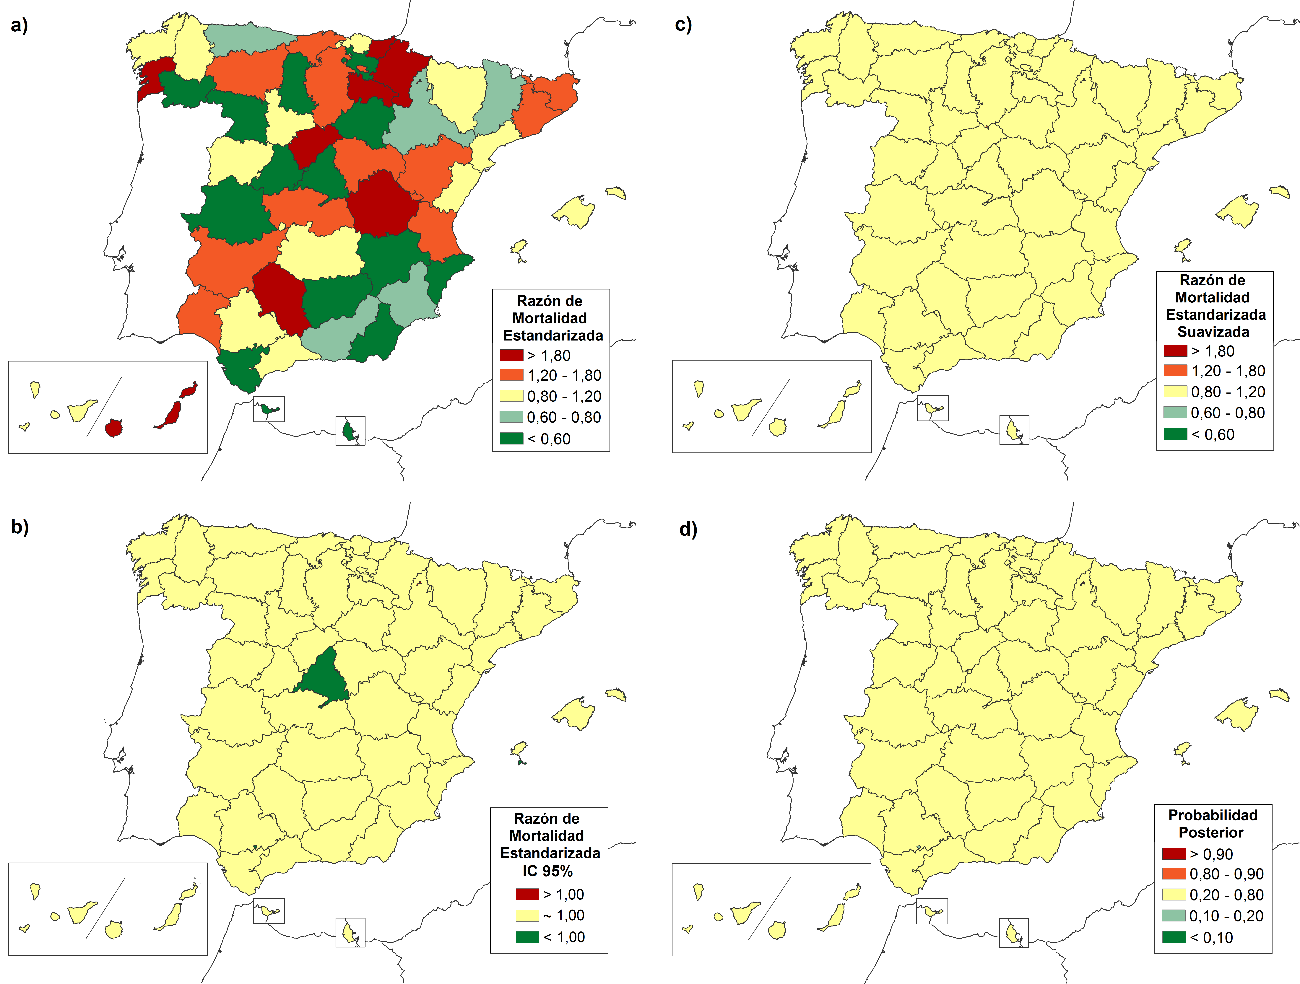


**Figura II.** Variabilidad provincial de la mortalidad atribuida a la telangiectasia hemorrágica hereditaria en España para mujeres (1981-2016). **a)** Razón de mortalidad estandarizada (RME). **b)** Intervalo de confianza del 95% de la RME, valores significativamente por encima o por debajo de lo esperado para el total nacional. **c)** RME suavizadas. **d)** Probabilidad *a posteriori* de las RME suavizadas.
